# Supplementary material for: Mobile Health Physical Activity Intervention Preferences in Cancer Survivors: A Qualitative Study
Source: PubMed Central journal article supplement (PMC5296620; doi:10.2196/mhealth.6970), 2017-01-24
Supplement: mhealth_v5i1e3_app3.pdf [file mhealth_v5i1e3_app3.pdf]

| <b>Ranking</b> | <b>App Feature</b>           | <b>N Comments</b> | <b>Percentage Positive</b> | <b>Description of App Feature</b>                                                                                                                       |
|----------------|------------------------------|-------------------|----------------------------|---------------------------------------------------------------------------------------------------------------------------------------------------------|
| 1              | Exercise by Muscle Group     | 8                 | 100%                       | Get exercise ideas for the specific muscle you want to target, track your progress over time, receive detailed instructions on how to use gym equipment |
| 2              | Electronic Tracking of Steps | 33                | 97%                        | Track your steps throughout the day, track your steps, distance, floors, and calories electronically                                                    |
| 3              | Tailored Text Messages       | 28                | 93%                        | Get tailored text messages sent directly to your phone                                                                                                  |
| 4              | Exercise Instruction         | 15                | 87%                        | Step-by-step instructions and video demonstrations                                                                                                      |
| 5              | GPS Tracker                  | 14                | 71%                        | View the route of your run/walk, track distance, pace, and duration                                                                                     |
| 6              | Measurement Tracker          | 14                | 71%                        | Track your measurements over time, track hip, waist, and neck circumference                                                                             |
| 7              | Fitness Routine Tracker      | 13                | 69%                        | Track your exercise, group exercises into separate workouts                                                                                             |
| 8              | Earn Medals                  | 17                | 65%                        | Earn medals for different activities you accomplish                                                                                                     |
| 9              | Distance Training            | 16                | 63%                        | Audio coach tells you when to walk or run, listen to your music                                                                                         |
| 10             | Competing with Friends       | 14                | 57%                        | Connect with friends and compete                                                                                                                        |
| 11             | Muscle Map                   | 10                | 50%                        | Keep track of specific muscle progress over time                                                                                                        |
| 12             | Connect with Social Media    | 20                | 25%                        | Post your progress on Twitter or Facebook                                                                                                               |
